# Supplementary material for: DREM 2.0: Improved reconstruction of dynamic regulatory networks from time-series expression data
Source: Springer Nature journal article supplement (doi:10.1186/1752-0509-6-104), 2012-01-01

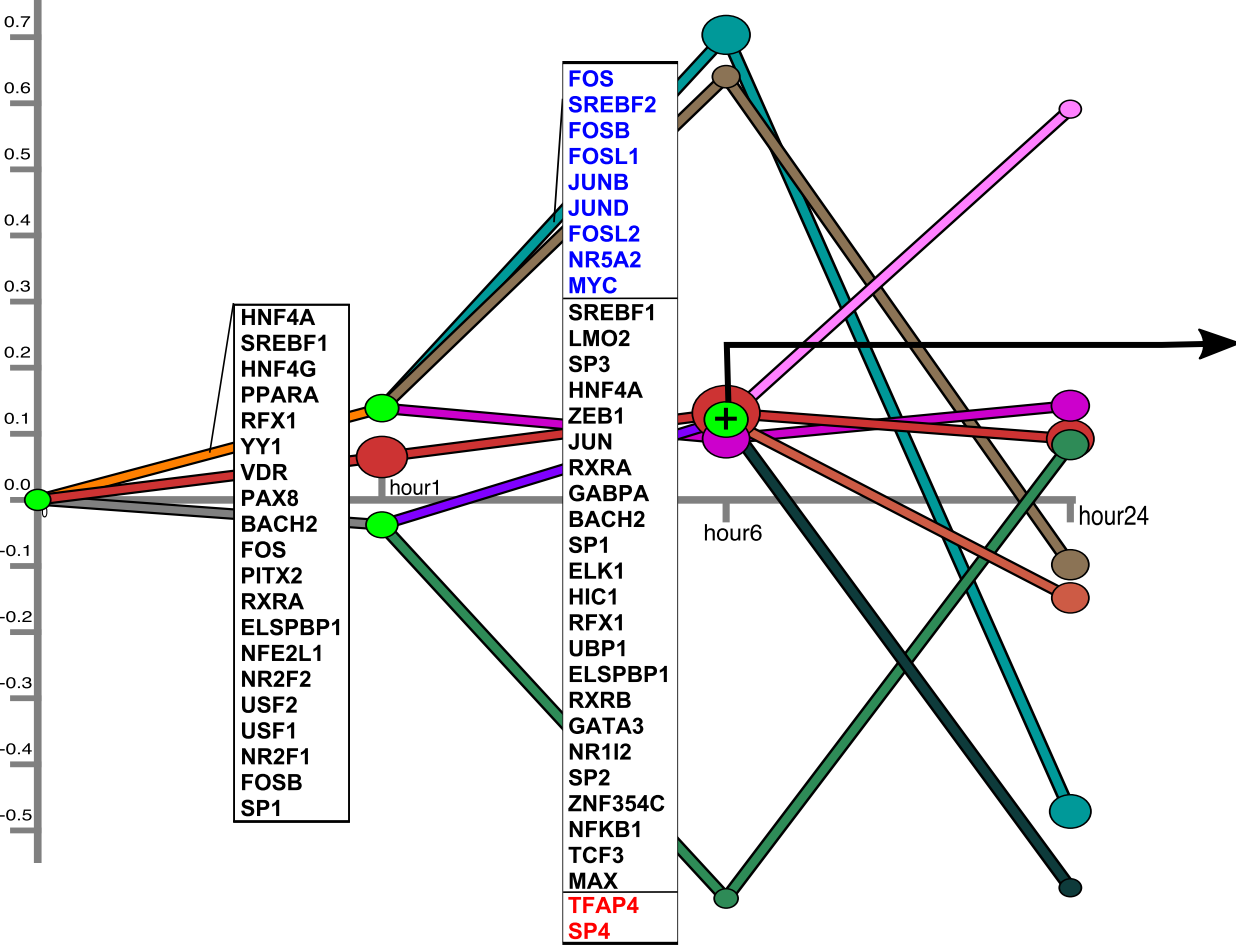

Split Table

Low vs. Others | Middle vs. Others | High vs. Others

| TF     | Coeff | High 0 | High 1 | Other 0 | Other 1 | Avg. High | Avg. Other | Diff   | Score   |
|--------|-------|--------|--------|---------|---------|-----------|------------|--------|---------|
| POU1F1 | 0     | 112    | 3      | 453     | 0       | 0.026     | 0.000      | 0.026  | 8.13e-3 |
| IRF7   | 0     | 111    | 4      | 450     | 3       | 0.035     | 0.007      | 0.028  | 0.034   |
| SMAD4  | 0     | 115    | 0      | 438     | 15      | 0.000     | 0.033      | -0.033 | 0.050   |
| POU2F1 | 0     | 115    | 0      | 436     | 17      | 0.000     | 0.038      | -0.038 | 0.058   |
| SMAD3  | 0     | 115    | 0      | 439     | 14      | 0.000     | 0.031      | -0.031 | 0.085   |
| PBX1   | 0     | 111    | 4      | 448     | 5       | 0.035     | 0.011      | 0.024  | 0.087   |
| FOXL1  | 0     | 113    | 2      | 452     | 1       | 0.017     | 0.002      | 0.015  | 0.106   |
| HMGA2  | 0     | 113    | 2      | 452     | 1       | 0.017     | 0.002      | 0.015  | 0.106   |
| RFX1   | 0     | 115    | 0      | 442     | 11      | 0.000     | 0.024      | -0.024 | 0.132   |
| MEIS1  | 0     | 115    | 0      | 442     | 11      | 0.000     | 0.024      | -0.024 | 0.132   |
| NR2F1  | 0     | 115    | 0      | 443     | 10      | 0.000     | 0.022      | -0.022 | 0.135   |
| SP2    | 0     | 115    | 0      | 443     | 10      | 0.000     | 0.022      | -0.022 | 0.135   |
| POU3F2 | 0     | 115    | 0      | 443     | 10      | 0.000     | 0.022      | -0.022 | 0.135   |
| SMAD2  | 0     | 115    | 0      | 443     | 10      | 0.000     | 0.022      | -0.022 | 0.135   |
| SMAD1  | 0     | 115    | 0      | 443     | 10      | 0.000     | 0.022      | -0.022 | 0.135   |
| NR2F2  | 0     | 115    | 0      | 441     | 12      | 0.000     | 0.026      | -0.026 | 0.138   |
| SP1    | 0     | 115    | 0      | 441     | 12      | 0.000     | 0.026      | -0.026 | 0.138   |
| PDX1   | 0     | 110    | 5      | 445     | 8       | 0.043     | 0.018      | 0.026  | 0.152   |
| VSX2   | 0     | 113    | 2      | 451     | 2       | 0.017     | 0.004      | 0.013  | 0.184   |
| IRF9   | 0     | 114    | 1      | 453     | 0       | -0.004    | 0.000      | -0.004 | 0.202   |
| HINFP  | 0     | 114    | 1      | 453     | 0       | 0.009     | 0.000      | 0.009  | 0.202   |
| XBP1   | 0     | 114    | 1      | 453     | 0       | 0.009     | 0.000      | 0.009  | 0.202   |
| RUNX1  | 0     | 115    | 0      | 444     | 9       | 0.000     | 0.020      | -0.020 | 0.216   |
| POU3F1 | 0     | 115    | 0      | 444     | 9       | 0.000     | 0.020      | -0.020 | 0.216   |
| POU2F2 | 0     | 115    | 0      | 444     | 9       | 0.000     | 0.020      | -0.020 | 0.216   |

Total number of genes most likely going through this state is 568

Intercept coefficient is 0; This hour6 state output distribution is Normal( $\mu = 0.122, \sigma = 0.282$ )

GO Split Table | Copy Table | Save Table | Run DECOD

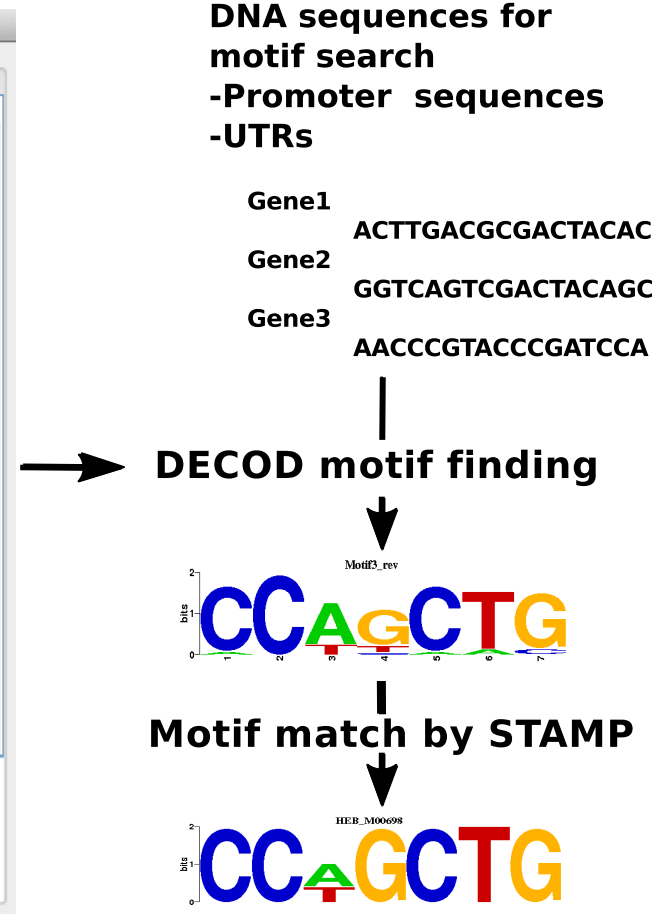

Supplement: 12918_2012_926_MOESM7_ESM.pdf [file 12918_2012_926_MOESM7_ESM.pdf]
