# Supplementary material for: DREM 2.0: Improved reconstruction of dynamic regulatory networks from time-series expression data
Source: Springer Nature journal article supplement (doi:10.1186/1752-0509-6-104), 2012-01-01

TF-gene interactions

Hidden states  
(network nodes)

Observed states  
(mRNA expression levels)

Static Input Layer

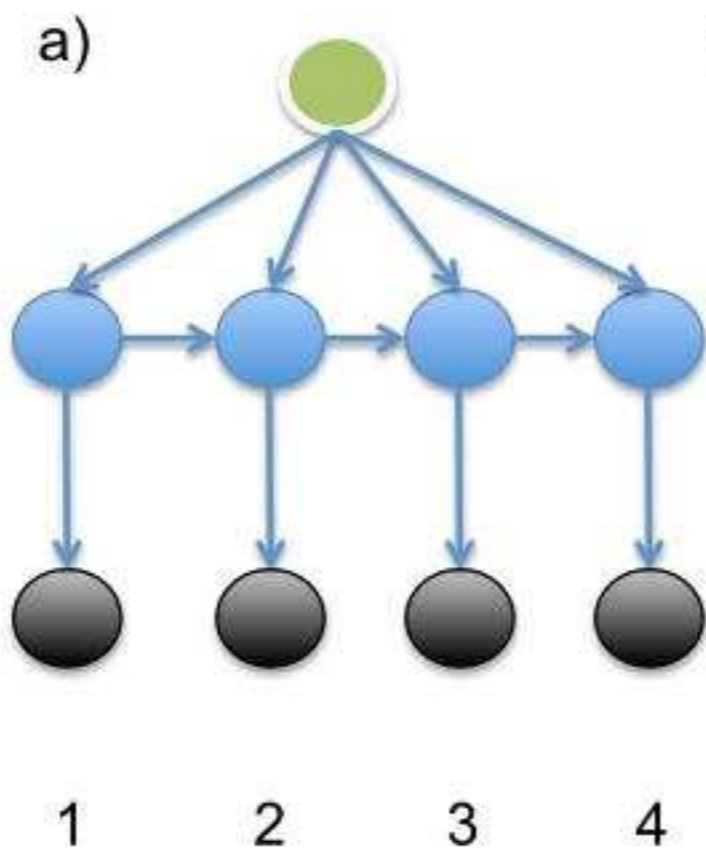

Dynamic Input Layer

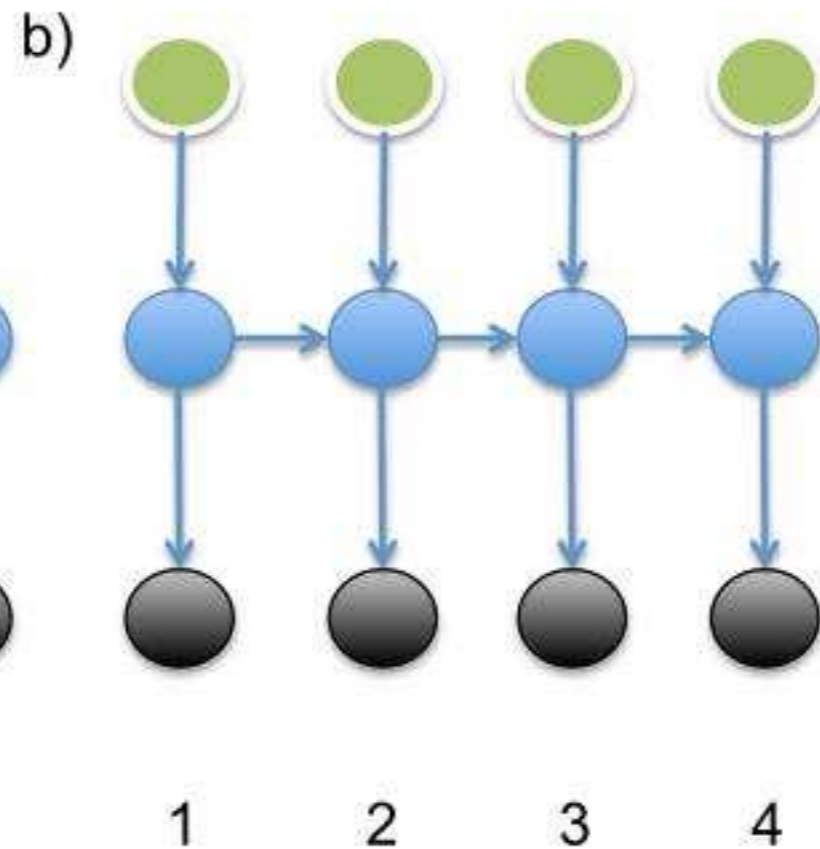

Mixed Input Layer

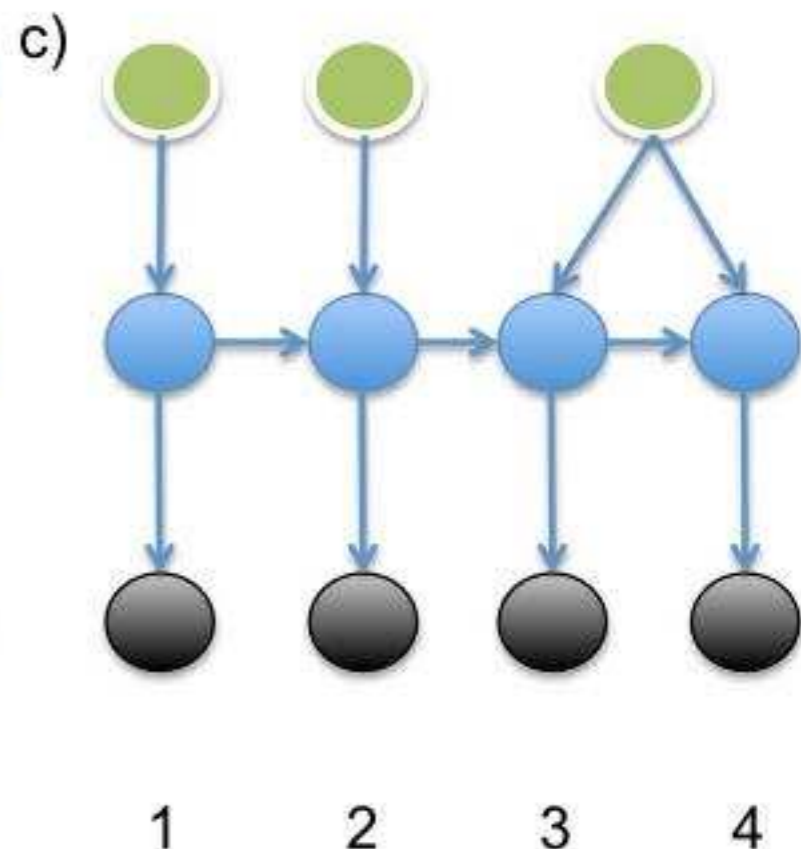

Supplement: 12918_2012_926_MOESM3_ESM.pdf [file 12918_2012_926_MOESM3_ESM.pdf]
