# Supplementary material for: DREM 2.0: Improved reconstruction of dynamic regulatory networks from time-series expression data
Source: Springer Nature journal article supplement (doi:10.1186/1752-0509-6-104), 2012-01-01

## 1. Data Input:

TF-gene Interaction Source:  TF-gene Interactions File:   Expression Data File:   Saved Model File:       Spot IDs in the data file    Log normalize data  Normalize data  No normalization/add 0 

## 2. Gene Annotation Input:

Gene Annotation Source:  Cross Reference Source:  Gene Annotation File:   Cross Reference File:   Download the latest:  Annotations  Cross References  Ontology 

## 3. Options:

 

## 4. Execute:

 © 2005, Carnegie Mellon University. All Rights Reserved. 

Options

Model Selection Options | Gene Annotations | GO Analysis | DECOD Options | Expression Scaling Options

Incorporate expression in regulator data for:  transcription factor Expression scaling weight   minimum TF expression after scaling  

Supplement: 12918_2012_926_MOESM4_ESM.pdf [file 12918_2012_926_MOESM4_ESM.pdf]
