# Supplementary material for: DREM 2.0: Improved reconstruction of dynamic regulatory networks from time-series expression data
Source: Springer Nature journal article supplement (doi:10.1186/1752-0509-6-104), 2012-01-01

Human condition specific time series expression data (supplied by the user)  
 -Microarrays  
 -RNA-Seq

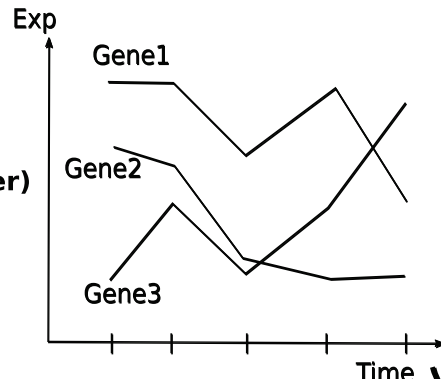

Human Protein-DNA interaction data (Provided by DREM 2.0)  
 -ChIP-Chip  
 -ChIP-Seq  
 -Computational predictions

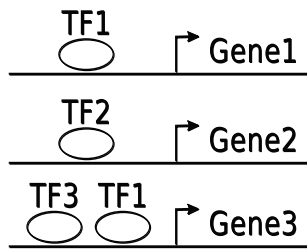

**DREM**  
**learning**

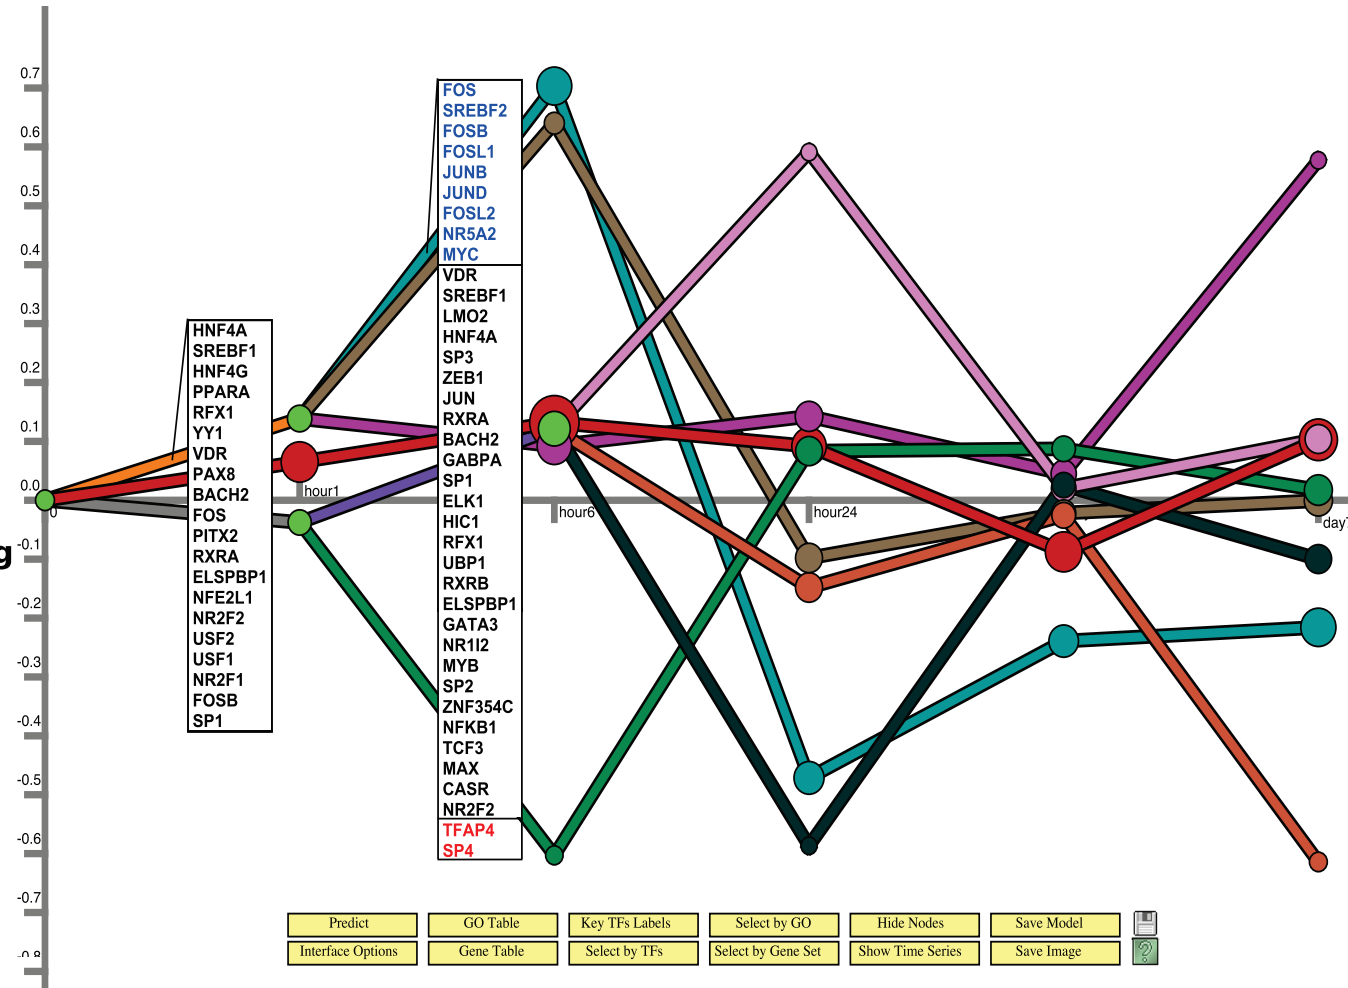

Supplement: 12918_2012_926_MOESM5_ESM.pdf [file 12918_2012_926_MOESM5_ESM.pdf]
