# Supplementary material for: DREM 2.0: Improved reconstruction of dynamic regulatory networks from time-series expression data
Source: Springer Nature journal article supplement (doi:10.1186/1752-0509-6-104), 2012-01-01
Supplement: 12918_2012_926_MOESM6_ESM.pdf [file 12918_2012_926_MOESM6_ESM.pdf]

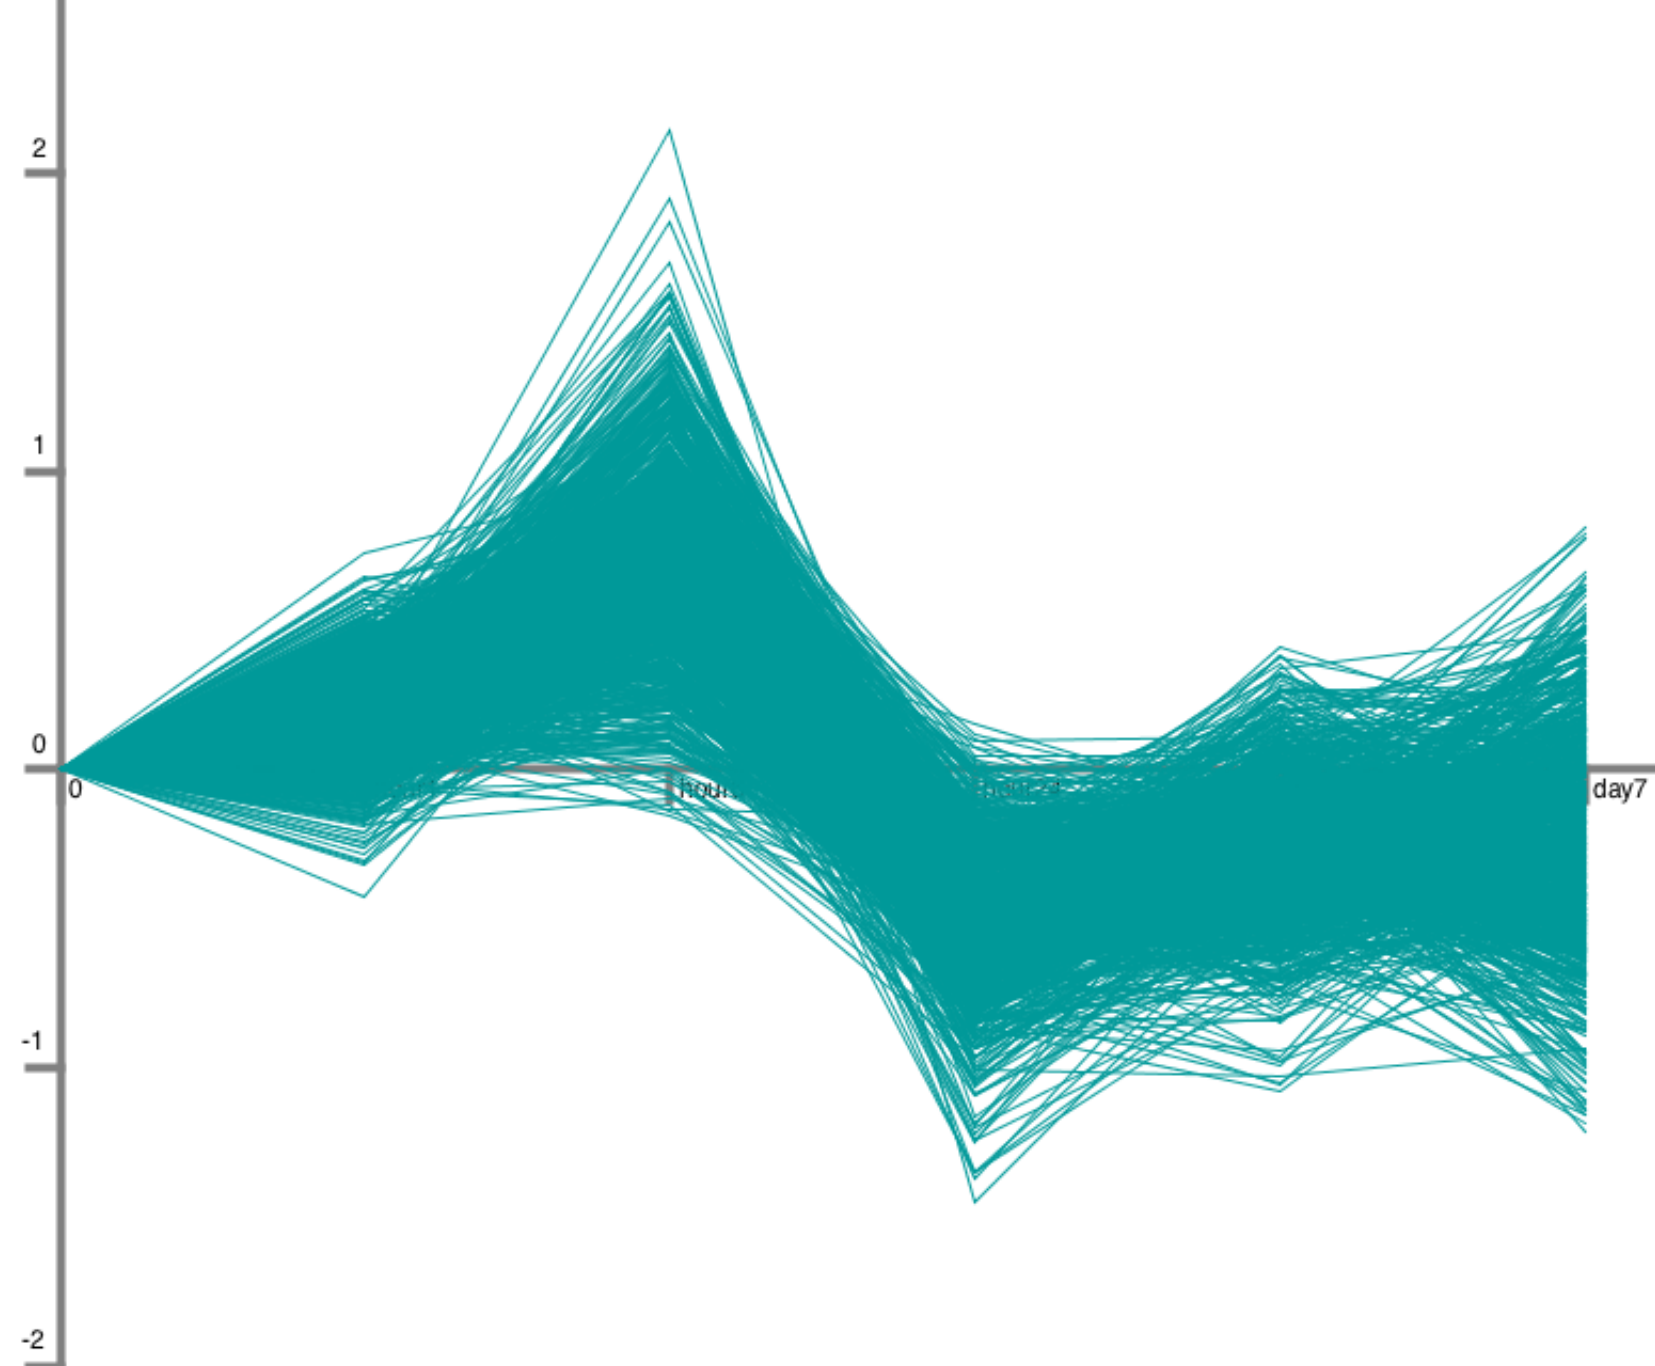

GO Enrichment for Selected Genes

| Category ID       | Category Name                              | #Genes      | #Genes       | #Genes       | #Genes       | p-value        | Corrected p-value | Fold       |
|-------------------|--------------------------------------------|-------------|--------------|--------------|--------------|----------------|-------------------|------------|
|                   |                                            | Category    | Assigned     | Expected     | Enriched     |                |                   |            |
| GO:0044...        | organelle part                             | 5945        | 443.0        | 307.7        | +135.3       | 1.3E-20        | 1.1E-16           | 1.4        |
| GO:0044...        | intracellular organelle part               | 5870        | 438.0        | 303.8        | +134.2       | 2.2E-20        | 1.7E-16           | 1.4        |
| GO:0005...        | cytoplasm                                  | 8675        | 588.0        | 449.0        | +139.0       | 6.8E-20        | 5.4E-16           | 1.3        |
| GO:0005...        | protein binding                            | 6767        | 485.0        | 350.3        | +134.7       | 1.4E-19        | 1.1E-15           | 1.4        |
| GO:0044...        | cytoplasmic part                           | 6392        | 463.0        | 330.9        | +132.1       | 2.9E-19        | 2.4E-15           | 1.4        |
| GO:0016...        | cellular component organization            | 3833        | 312.0        | 198.4        | +113.6       | 1.2E-18        | 9.5E-15           | 1.6        |
| GO:0043...        | intracellular organelle                    | 9966        | 646.0        | 515.8        | +130.2       | 6.6E-18        | 5.3E-14           | 1.3        |
| GO:0048...        | positive regulation of biological process  | 3084        | 258.0        | 159.6        | +98.4        | 1.7E-16        | 1.3E-12           | 1.6        |
| GO:0048...        | positive regulation of cellular process    | 2805        | 239.0        | 145.2        | +93.8        | 4.1E-16        | 3.3E-12           | 1.6        |
| GO:0071...        | cellular component organization at cell... | 3002        | 251.0        | 155.4        | +95.6        | 5.6E-16        | 4.5E-12           | 1.6        |
| GO:0043...        | membrane-bounded organelle                 | 9044        | 591.0        | 468.1        | +122.9       | 6.2E-16        | 5.0E-12           | 1.3        |
| GO:0043...        | intracellular membrane-bounded orga...     | 9032        | 590.0        | 467.5        | +122.5       | 7.6E-16        | 6.1E-12           | 1.3        |
| GO:0071...        | cellular component organization or bio...  | 3098        | 256.0        | 160.4        | +95.6        | 1.1E-15        | 8.6E-12           | 1.6        |
| GO:0044...        | intracellular part                         | 11546       | 712.0        | 597.6        | +114.4       | 4.5E-15        | 3.7E-11           | 1.2        |
| GO:0005...        | intracellular                              | 11824       | 720.0        | 612.0        | +108.0       | 8.3E-14        | 6.7E-10           | 1.2        |
| GO:0051...        | regulation of cellular component organi... | 1099        | 116.0        | 56.9         | +59.1        | 1.0E-13        | 8.4E-10           | 2.0        |
| GO:0044...        | cell part                                  | 14663       | 850.0        | 759.0        | +91.0        | 1.1E-13        | 8.5E-10           | 1.1        |
| <b>GO:0006...</b> | <b>response to stress</b>                  | <b>2775</b> | <b>227.0</b> | <b>143.6</b> | <b>+83.4</b> | <b>2.5E-13</b> | <b>2.0E-9</b>     | <b>1.6</b> |
| GO:0065...        | regulation of biological quality           | 2526        | 210.0        | 130.7        | +79.3        | 5.6E-13        | 4.5E-9            | 1.6        |
| GO:0042...        | response to chemical stimulus              | 2632        | 215.0        | 136.2        | +78.8        | 1.6E-12        | 1.3E-8            | 1.6        |
| GO:0032...        | regulation of cellular component size      | 445         | 60.0         | 23.0         | +37.0        | 9.6E-12        | 7.7E-8            | 2.6        |
| GO:0042...        | regulation of cell proliferation           | 1099        | 110.0        | 56.9         | +53.1        | 1.4E-11        | 1.1E-7            | 1.9        |
| GO:0044...        | primary metabolic process                  | 8089        | 520.0        | 418.7        | +101.3       | 1.9E-11        | 1.5E-7            | 1.2        |
| GO:0044...        | cellular metabolic process                 | 8014        | 516.0        | 414.8        | +101.2       | 1.9E-11        | 1.5E-7            | 1.2        |
| GO:0006...        | organelle organization                     | 1939        | 166.0        | 100.4        | +65.6        | 2.9E-11        | 2.3E-7            | 1.7        |

Copy Table Save Table
