# Supplementary material for: DREM 2.0: Improved reconstruction of dynamic regulatory networks from time-series expression data
Source: Springer Nature journal article supplement (doi:10.1186/1752-0509-6-104), 2012-01-01
Supplement: 12918_2012_926_MOESM8_ESM.pdf [file 12918_2012_926_MOESM8_ESM.pdf]

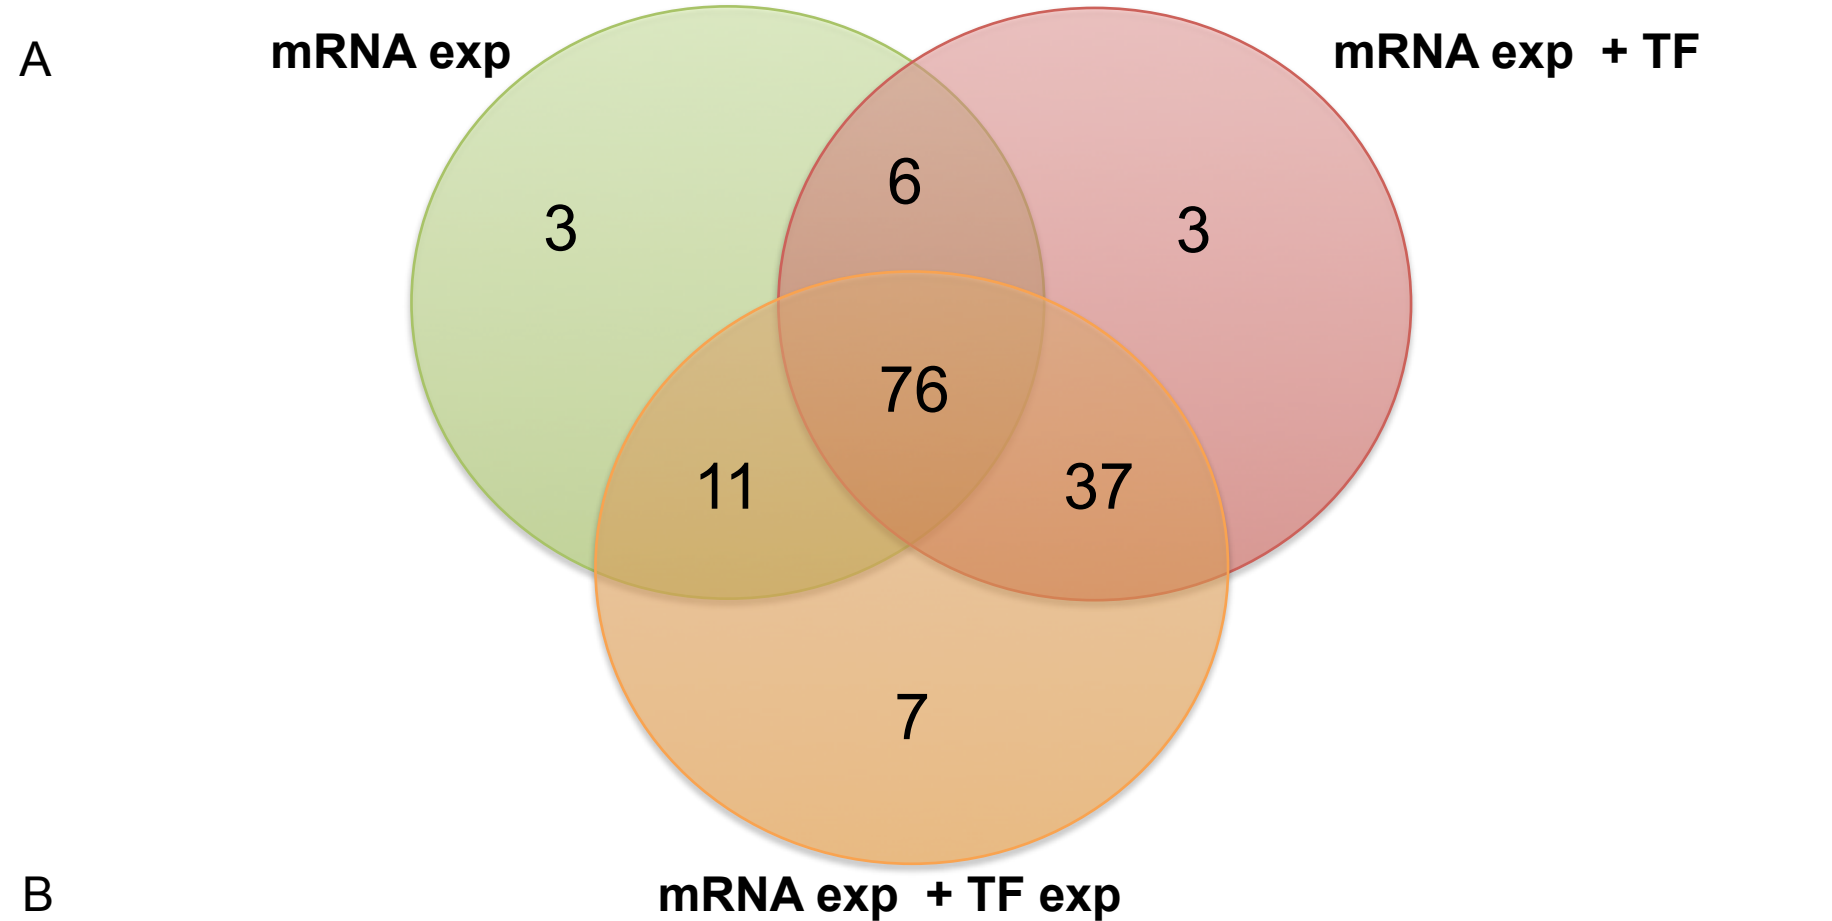

**Unique GO terms (Bonferroni corrected p-value  $\leq 0.05$ )**

|                   |                                                                                                                                                                                                                |
|-------------------|----------------------------------------------------------------------------------------------------------------------------------------------------------------------------------------------------------------|
| mRNA exp + TF exp | cellular response to stress, response to wounding , regulation of cellular protein metabolic process, cell morphogenesis, positive regulation of cell death, protein localization, cellular component movement |
| mRNA exp + TF     | positive regulation of cellular metabolic process, protein dimerization activity, cell-substrate adhesion                                                                                                      |
| mRNA exp          | vesicle, cytoskeletal protein binding, actin binding                                                                                                                                                           |
